# Supplementary material for: Estrogen metabolism in the human lung: impact of tumorigenesis, smoke, sex and race/ethnicity
Source: PubMed Central journal article supplement (PMC5739773; doi:10.18632/oncotarget.22269), 2017-11-01
Supplement: oncotarget-08-106778-s001.pdf [file oncotarget-08-106778-s001.pdf]

## **Estrogen metabolism in the human lung: impact of tumorigenesis, smoke, sex and race/ethnicity**

### **SUPPLEMENTARY MATERIALS**

**Supplementary Table 1: Detailed information of each NSCLC patient.** See Supplementary\_Table\_1
